# Supplementary material for: Lipoarabinomannan mediates localized cell wall integrity during division in mycobacteria
Source: PubMed Central journal article supplement (PMC10928101; doi:10.1038/s41467-024-46565-5), 2024-03-11
Supplement: 41467_2024_46565_MOESM1_ESM.pdf [file 41467_2024_46565_MOESM1_ESM.pdf]

**Supplemental Information for**  
**Lipoarabinomannan mediates localized cell wall integrity**  
**during division in mycobacteria**

Ian L. Sparks<sup>1</sup>, Takehiro Kado<sup>1</sup>, Malavika Prithviraj<sup>1</sup>, Japinder Nijjer<sup>2,3</sup>, Jing Yan<sup>2,3</sup>, and Yasu S. Morita<sup>1\*</sup>

<sup>1</sup> Department of Microbiology, University of Massachusetts, Amherst, MA, USA. <sup>2</sup> Department of Molecular, Cellular and Developmental Biology, Yale University, New Haven, CT, USA. <sup>3</sup> Quantitative Biology Institute, Yale University, New Haven, CT, USA.

\* ymorita@umass.edu

**This PDF file includes:**

Figures S1 to S4  
Table S1 to S3

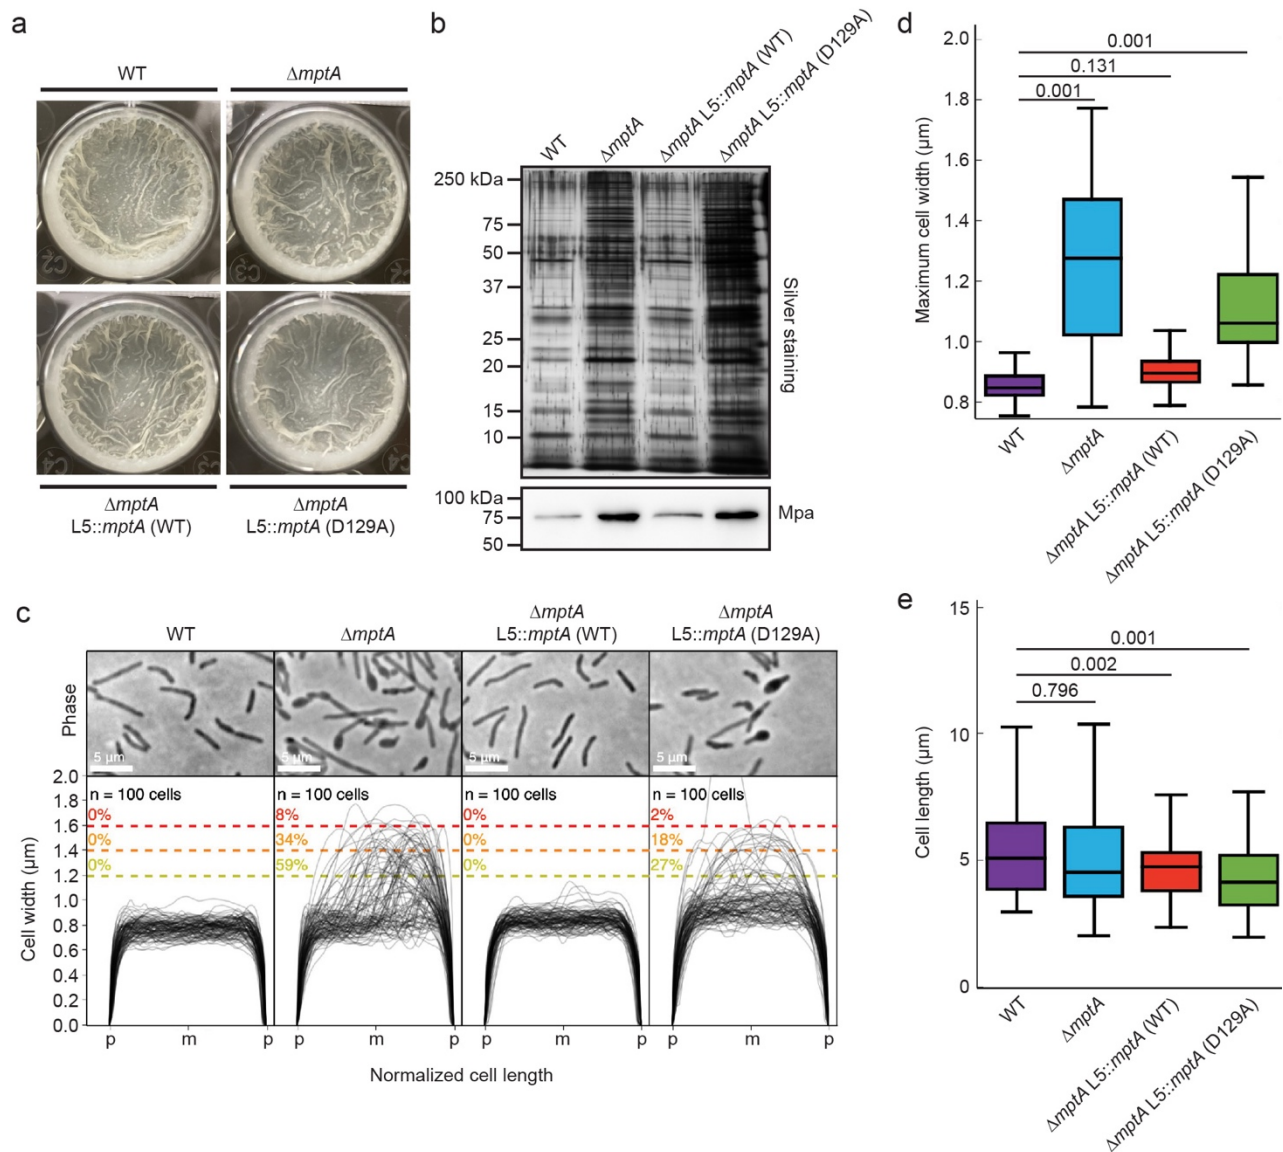

**Figure S1. MptA-deficient cells lyse in pellicle growth.** **a)** Top-down view of WT,  $\Delta mptA$ ,  $\Delta mptA$  L5::mptA (WT), and  $\Delta mptA$  L5::mptA (D129A) pellicle biofilms after 5-day growth in M63 at 37°C. **b)** SDS-PAGE of culture filtrates from WT,  $\Delta mptA$ ,  $\Delta mptA$  L5::mptA (WT), and  $\Delta mptA$  L5::mptA (D129A) pellicles visualized by silver staining (top) and anti-Mpa (cytoplasmic marker protein) immunoblotting (bottom). **c)** Phase contrast micrographs and cell width profiles of WT,  $\Delta mptA$ ,  $\Delta mptA$  L5::mptA (WT), and  $\Delta mptA$  L5::mptA (D129A) pellicles grown in M63 medium. Each cell's length was normalized to the same length with "p" and "m" indicating cell poles and mid-cell, respectively. The percentage values above the dotted colored lines indicate the portion of cells exhibiting maximum cell widths greater than or equal to the corresponding cell width threshold. **d and e)** Boxplots comparing the distribution of maximum cell widths (d) and cell lengths (e) of WT,  $\Delta mptA$ ,  $\Delta mptA$  L5::mptA (WT), and  $\Delta mptA$  L5::mptA (D129A) cells grown as pellicles in M63 medium. A box spanning the interquartile range (IQR) is drawn from the first quartile to the third quartile with a horizontal line indicating the median. The whiskers extend from the box to the farthest data point within 1.5xIQR from the box. Statistical significance was determined by ANOVA and Tukey post-hoc test. n = 100 cells for each strain in panel d and n = 100, 112, 157, 135 cells for WT,  $\Delta mptA$ ,  $\Delta mptA$  L5::mptA (WT), and  $\Delta mptA$  L5::mptA (D129A) respectively in panel e. Source data for panels b-e are provided in the Source Data file. Macro and Microscopy image data for panels a, c, d, and e are available at [https://github.com/IanLairdSparks/Sparks\\_2023](https://github.com/IanLairdSparks/Sparks_2023).

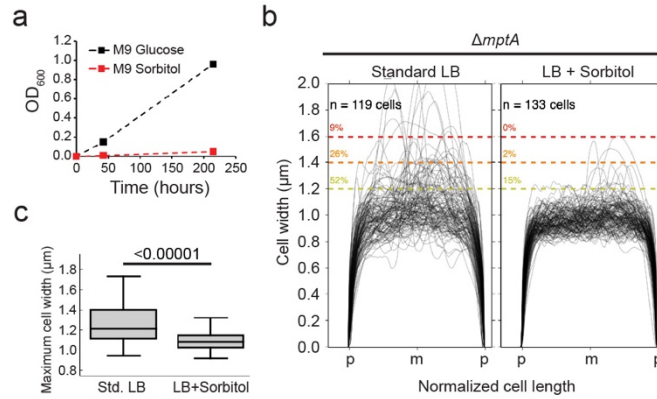

**Figure S2. Defective cell morphology of  $\Delta mptA$  grown planktonically in LB broth was alleviated by sorbitol.** **a)** Growth curve, measured by optical density at 600 nm, of WT *M. smegmatis* in standard M9 minimum medium (containing 22 mM glucose as a sole carbon source; black) or modified M9 (containing 22 mM sorbitol as a sole carbon source; red), showing that *M. smegmatis* cannot grow on sorbitol as a sole carbon source. **b)** Cell width profiles of  $\Delta mptA$  cells grown planktonically in LB and osmo-protective LB (supplemented with 500 mM sorbitol). Normalized cell width profile was graphed as described in Fig. S1c. **c)** Boxplot comparing the distribution of maximum cell widths between  $\Delta mptA$  cells planktonically grown in standard vs. osmo-protective LB broth. Boxplots are drawn as described in Fig. S1d and e. Statistical significance was determined using the student's T-test.  $P = 3.22 \times 10^{-12}$ .  $n = 119$  and  $133$  cells for  $\Delta mptA$  in standard LB and LB + sorbitol respectively. Source data for each sub panel are provided in the Source Data file. Microscopy image data for panels b and c are available at [https://github.com/IanLairdSparks/Sparks\\_2023](https://github.com/IanLairdSparks/Sparks_2023).

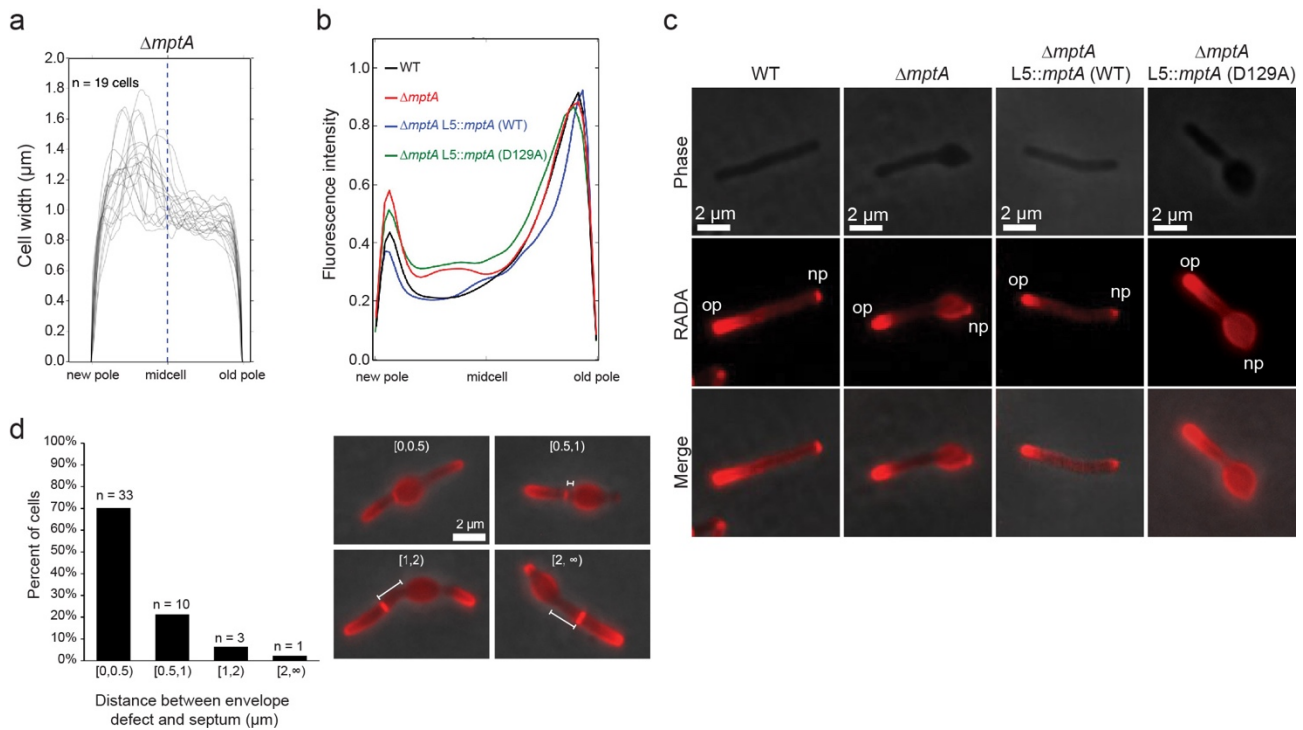

**Figure S3. Cell envelope defects associate with the new pole and septa.** **a)** New-pole-aligned cell width profiles of deformed, non-septated  $\Delta mptA$  cells grown planktonically in LB medium. Cells were labelled with RADA and aligned from the new pole (dim) to the old pole (bright) based on RADA labelling. **b)** New-pole-aligned RADA labelling profile of WT,  $\Delta mptA$ ,  $\Delta mptA$  L5::mptA (WT), and  $\Delta mptA$  L5::mptA (D129A) cells grown planktonically in LB medium (n = 66, n = 53, n = 64, n = 35 respectively). Only non-septated cells were selected for the analysis. **c)** Example phase-contrast and fluorescence microscopy images of RADA-labelled WT,  $\Delta mptA$ ,  $\Delta mptA$  L5::mptA (WT), and  $\Delta mptA$  L5::mptA (D129A) cells. np, the new pole; op, the old pole. **d)** Quantification of the distance between RADA-labeled cell envelope deformations and the septum in 47 septated  $\Delta mptA$  cells. The cell length of 47 septated cells ranged from 3.2 to 9.2  $\mu\text{m}$ . Distances were binned into four categories: less than 0.5  $\mu\text{m}$  (denoted as [0,0.5)), greater than or equal to 0.5  $\mu\text{m}$  and less than 1  $\mu\text{m}$  (denoted as [0.5,1)), greater than or equal to 1  $\mu\text{m}$  and less than 2  $\mu\text{m}$  (denoted as [1,2)), or greater than or equal to 2  $\mu\text{m}$  (denoted as [2,∞)). The micrographs depict example merged phase-contrast/fluorescence images of RADA-labeled  $\Delta mptA$  cells for each bin. White line indicates the measured distance for each cell. Source data for panels a, b, and d are provided in the Source Data file. Microscopy image data for each sub panel are available at [https://github.com/IanLairdSparks/Sparks\\_2023](https://github.com/IanLairdSparks/Sparks_2023).

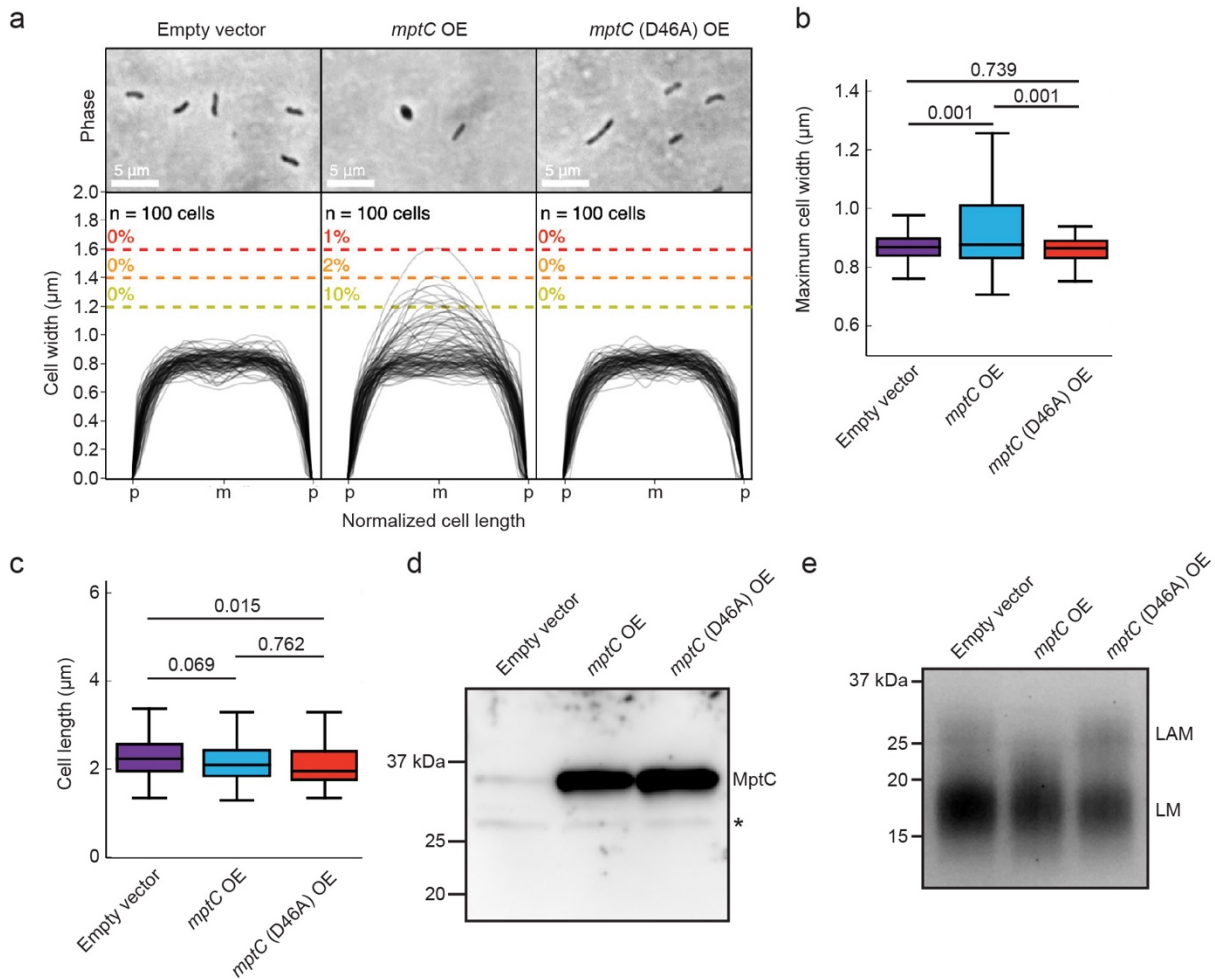

**Figure S4. *mptC* overexpression induces cell shape defects in *M. tuberculosis*.** **a)** Phase contrast micrographs and cell width profiles of *M. tuberculosis* transformed with empty vector control, *mptC* overexpression vector (*mptC* OE), and catalytically inactive *mptC* overexpression vector (*mptC* (D46A) OE) grown in Middlebrook 7H9. Cell width profiles were graphed as described in Fig. S1c. **b and c)** Boxplots comparing the distribution of maximum cell widths (b) and cell lengths (c) of *mptC* OE, *mptC* (D46A) OE, and empty vector control strains grown in Middlebrook 7H9. Boxplots are drawn as described in Fig. S1d and e. Statistical significance was determined by ANOVA and Tukey post-hoc test. n = 100 cells for each strain in panel b and n = 218, 138, 109 cells for empty vector control, *mptC* OE, and *mptC* (D46A) OE respectively in panel c. **d)** Anti-MptC immunoblot of cell lysates prepared from *mptC* OE, *mptC* (D46A) OE, and empty vector control strains grown in Middlebrook 7H9. The asterisk indicates a nonspecific band. **e)** SDS-PAGE of lipoglycans extracted from *mptC* OE, *mptC* (D46A) OE, and empty vector control *M. tuberculosis* strains, visualized by glycan staining. Source data for each sub panel are provided in the Source Data file. Microscopy image data for panels a-c are available at [https://github.com/lanLairdSparks/Sparks\\_2023](https://github.com/lanLairdSparks/Sparks_2023).

| Antibiotic<br>(+sulbactam) | MIC ( $\mu\text{g/ml}$ ) |               | Fold change in sensitivity<br>( $\Delta mptA$ / WT) |
|----------------------------|--------------------------|---------------|-----------------------------------------------------|
|                            | WT                       | $\Delta mptA$ |                                                     |
| Isoniazid                  | 25.0                     | 20.8          | 1.2                                                 |
| Vancomycin                 | 0.8                      | 0.4           | 2.0                                                 |
| Moenomycin                 | 0.8                      | 0.2           | 4.0                                                 |
| Ampicillin                 | 8.3                      | 0.2           | 42.7                                                |
| Meropenem                  | 6.3                      | 0.8           | 8.0                                                 |
| D-cycloserine              | 83.3                     | 50.0          | 1.7                                                 |
| Kanamycin                  | 2.1                      | 0.8           | 2.7                                                 |

**Table S1.  $\Delta mptA$  is more sensitive to  $\beta$ -lactam antibiotics.** Cells were grown in Middlebrook 7H9. MIC, minimum inhibitory concentration. A non-growth-inhibitory dose of 50  $\mu\text{g/ml}$  sulbactam was added to inhibit  $\beta$ -lactamases. Known primary drug targets are: isoniazid, the outer membrane biosynthesis; vancomycin and moenomycin, cell wall transglycosylation; ampicillin, cell wall transpeptidation (primarily D-D crosslinks); meropenem, cell wall transpeptidation (primarily L-D crosslinks); D-cycloserine, cytoplasmic cell wall precursor synthesis; and kanamycin, ribosome. Source data are provided in the Source Data file.

| Antibiotic<br>(+sulbactam) | MIC ( $\mu\text{g/ml}$ )<br>In LB |               | Fold change<br>in sensitivity<br>( $\Delta mptA$ / WT) | MIC ( $\mu\text{g/ml}$ )<br>in LB + Sorbitol |               | Fold change<br>in sensitivity<br>( $\Delta mptA$ / WT) |
|----------------------------|-----------------------------------|---------------|--------------------------------------------------------|----------------------------------------------|---------------|--------------------------------------------------------|
|                            | WT                                | $\Delta mptA$ |                                                        | WT                                           | $\Delta mptA$ |                                                        |
| Ampicillin                 | 200                               | 2.3           | 85.3                                                   | 200                                          | 12.5          | 16                                                     |
| Meropenem                  | 50                                | 0.39          | 128.2                                                  | 200                                          | 6.25          | 32                                                     |
| Kanamycin                  | 3.1                               | 1.6           | 2                                                      | 3.1                                          | 2.3           | 1.3                                                    |

**Table S2. Antibiotic sensitivity of  $\Delta mptA$  is pronounced in LB and the enhanced antibiotic susceptibility is alleviated by sorbitol supplementation.** MIC, minimum inhibitory concentration. A non-growth-inhibitory dose of 50  $\mu\text{g/ml}$  sulbactam was added to inhibit  $\beta$ -lactamases. Source data are provided in the Source Data file.

| Antibiotic<br>(+sulbactam) | $\Delta mptA$ | MIC ( $\mu\text{g/ml}$ ) In LB |                                   |
|----------------------------|---------------|--------------------------------|-----------------------------------|
|                            |               | $\Delta mptA$<br>L5::mptA (WT) | $\Delta mptA$<br>L5::mptA (D129A) |
| Ampicillin                 | 1.56          | 18.75                          | 1.56                              |
| Meropenem                  | 0.39          | 3.13                           | 1.56                              |

**Table S3. Antibiotic sensitivity of  $\Delta mptA$  is restored by WT  $mptA$  complementation.** MIC, minimum inhibitory concentration. A non-growth-inhibitory dose of 50  $\mu\text{g/ml}$  sulbactam was added to inhibit  $\beta$ -lactamases. Source data are provided in the Source Data file.
